# Supplementary material for: PCK1 Downregulation Promotes TXNRD1 Expression and Hepatoma Cell Growth via the Nrf2/Keap1 Pathway
Source: Front Oncol. 2018 Dec 17;8:611. doi: 10.3389/fonc.2018.00611 (PMC6304441; doi:10.3389/fonc.2018.00611)
Supplement: Supplementary file 8 [file Table_2.XLSX]

## Sheet: Sheet1
Tab S2 Differentially expressed genes between Huh7 cells overexpressing PCK1 and GFP control identified using RNA sequencing.
Gene symbol	KeggID	AdPCK1	AdGFP	FoldChange	Log2FlodChange	P-Value	FDR	Style
IGDCC3	hsa:9543	82.1492	381.461	0.215354	-2.21522	4.93003e-46	9.58939e-42	down
PCK1	hsa:5105	9433.29	1.26412	7462.33	12.8654	5.24717e-24	5.10313e-20	up
TXNRD1	hsa:7296	4018.97	7114.47	0.564901	-0.823931	1.23152e-21	7.98475e-18	down
POTEF	hsa:728378	56.8892	185.615	0.30649	-1.70609	1.34542e-20	6.54244e-17	down
AMIGO2	hsa:347902	877.52	449.876	1.95058	0.963906	1.82867e-20	7.1139e-17	up
SERPING1	hsa:710	2002.5	3834.68	0.522207	-0.937307	4.58976e-19	1.37927e-15	down
TRIB3	hsa:57761	1295.91	715.884	1.81022	0.856164	4.96369e-19	1.37927e-15	up
SYT11	hsa:23208	69.7037	213.129	0.327049	-1.61242	7.88251e-19	1.91653e-15	down
TBC1D13	hsa:54662	385.816	728.432	0.529652	-0.916883	6.73794e-17	1.45622e-13	down
CHAC1	hsa:79094	196.027	67.2173	2.91632	1.54415	9.38579e-16	1.67235e-12	up
CREB3L3	hsa:84699	703.054	344.719	2.0395	1.02822	9.76052e-16	1.67235e-12	up
TDO2	hsa:6999	149.335	46.8789	3.18554	1.67154	1.03173e-15	1.67235e-12	up
CA2	hsa:760	1508.74	899.649	1.67704	0.745915	1.53946e-15	2.30339e-12	up
MUC13	hsa:56667	299.831	136.772	2.1922	1.13238	7.21712e-15	1.00272e-11	up
HIST2H2BE	hsa:8349	76.8297	245.355	0.313137	-1.67513	1.42818e-14	1.85197e-11	down
ALDH5A1	hsa:7915	157.695	332.239	0.474645	-1.07508	2.52309e-14	3.06729e-11	down
MIDN	hsa:90007	1033.23	1688.93	0.611766	-0.708947	2.77806e-14	3.17859e-11	down
CCR6	hsa:1235	496.066	263.984	1.87915	0.910082	5.76464e-14	6.22934e-11	up
IGFBP3	hsa:3486	626.581	343.999	1.82146	0.865097	1.44009e-13	1.47427e-10	up
GPSM1	hsa:26086	64.9891	177.302	0.366544	-1.44794	3.59013e-13	3.40288e-10	down
LIPG	hsa:9388	578.871	325.465	1.77859	0.830738	3.67387e-13	3.40288e-10	up
TLE3	hsa:7090	231.593	438.145	0.528576	-0.919818	4.11068e-13	3.59323e-10	down
CTDSP2	hsa:10106	699.939	1147.53	0.609951	-0.713234	4.24885e-13	3.59323e-10	down
BOP1	hsa:23246	773.937	443.916	1.74343	0.801928	1.55478e-12	1.22701e-09	up
DPYSL3	hsa:1809	231.002	449.557	0.513843	-0.960601	1.57705e-12	1.22701e-09	down
AKR1B10	hsa:57016	2173.03	1322.07	1.64366	0.716912	1.7532e-12	1.26302e-09	up
TGIF2-C20orf24	hsa:100527943	1394.46	889.092	1.56841	0.649304	5.20041e-12	3.61262e-09	up
C20orf24	hsa:55969	1597.56	1030.11	1.55086	0.633071	6.06858e-12	4.07034e-09	up
SAMD11	hsa:148398	51.3139	139.502	0.367837	-1.44286	6.39495e-12	4.14627e-09	down
SMAD9	hsa:4093	33.5667	106.621	0.314824	-1.66738	8.00303e-12	5.02152e-09	down
TTYH3	hsa:80727	406.821	693.083	0.586973	-0.768634	8.75805e-12	5.32352e-09	down
SATB1	hsa:6304	55.8224	148.81	0.375126	-1.41455	1.08985e-11	6.42382e-09	down
RPL21P16		211.087	96.0767	2.19707	1.13558	1.25682e-11	7.19013e-09	up
LOC645166	hsa:645166	432.088	242.518	1.78167	0.833232	1.64952e-11	9.1671e-09	up
MAPKAPK2	hsa:9261	467.542	831.836	0.562061	-0.831201	2.25254e-11	1.21706e-08	down
SESN2	hsa:83667	1066.65	564.177	1.89063	0.918869	2.47332e-11	1.30023e-08	up
ZFAND2A	hsa:90637	428.002	243.029	1.76112	0.81649	2.86345e-11	1.46571e-08	up
GCNT3	hsa:9245	271.471	138.843	1.95523	0.96734	3.80587e-11	1.89816e-08	up
EPHX1	hsa:2052	1854.86	1217.77	1.52316	0.60707	3.97948e-11	1.93512e-08	up
DDIT3	hsa:1649	438.002	247.945	1.76653	0.820918	4.33782e-11	2.05793e-08	up
KAT6A	hsa:7994	577.963	919.339	0.628672	-0.669621	5.98951e-11	2.64777e-08	down
MFAP3	hsa:4238	215.926	391.003	0.552236	-0.856644	7.31094e-11	3.16011e-08	down
GTF2IP1	hsa:2970	647.475	1046.38	0.618773	-0.692517	7.77469e-11	3.28751e-08	down
DAPK1	hsa:1612	944.97	1429.17	0.661202	-0.596836	1.16419e-10	4.71764e-08	down
IFI30	hsa:10437	764.192	472.248	1.6182	0.694391	1.20202e-10	4.77151e-08	up
BOK	hsa:666	223.829	436.167	0.513173	-0.962482	1.3599e-10	5.29029e-08	down
IL17RB	hsa:55540	906.069	575.032	1.57568	0.655979	1.52633e-10	5.72348e-08	up
DMTN	hsa:2039	175.319	321.998	0.544471	-0.877074	1.53011e-10	5.72348e-08	down
LSM7	hsa:51690	1054.52	688.44	1.53175	0.615181	3.22388e-10	1.14014e-07	up
PZP	hsa:5858	38.8405	103.528	0.375168	-1.41439	4.20253e-10	1.43409e-07	down
SOX4	hsa:6659	1484.5	2455.94	0.604453	-0.726297	4.3637e-10	1.46342e-07	down
FSTL1	hsa:11167	306.678	587.271	0.522209	-0.937302	5.54093e-10	1.82672e-07	down
DAZAP2	hsa:9802	648.811	992.985	0.653394	-0.613974	5.85501e-10	1.8981e-07	down
VAMP3	hsa:9341	630.484	976.453	0.645688	-0.631092	6.44134e-10	2.05394e-07	down
ABCA2	hsa:20	537.929	840.23	0.640217	-0.643368	6.97382e-10	2.18787e-07	down
COL12A1	hsa:1303	336.811	549.514	0.612925	-0.706218	8.81576e-10	2.72183e-07	down
KIAA0430	hsa:9665	143.078	287.26	0.498077	-1.00556	9.44536e-10	2.87065e-07	down
ONECUT2	hsa:9480	975.66	1541.74	0.632829	-0.660112	1.08099e-09	3.23481e-07	down
RMND5A	hsa:64795	436.287	692.066	0.630412	-0.665633	1.2641e-09	3.72545e-07	down
MYH4	hsa:4622	233.056	116.303	2.00387	1.00279	1.76549e-09	4.97689e-07	up
IMPAD1	hsa:54928	556.342	852.296	0.652756	-0.615384	2.06286e-09	5.73209e-07	down
FERMT1	hsa:55612	177.745	317.699	0.559475	-0.837855	2.38845e-09	6.54335e-07	down
NOP16	hsa:51491	970.968	641.114	1.5145	0.598843	2.63522e-09	7.06475e-07	up
C12orf36	hsa:283422	32.1897	3.90876	8.23528	3.04182	2.72787e-09	7.17026e-07	up
CCDC117	hsa:150275	378.181	602.169	0.628032	-0.671091	3.52721e-09	9.14769e-07	down
LOC654342	hsa:654342	515.081	315.939	1.63032	0.705154	3.84552e-09	9.84199e-07	up
IAH1	hsa:285148	109.781	213.115	0.515125	-0.957007	3.93689e-09	9.945e-07	down
DDIT4	hsa:54541	212.432	101.671	2.08941	1.0631	4.45408e-09	1.11072e-06	up
RNF44	hsa:22838	404.917	636.127	0.636534	-0.65169	4.51797e-09	1.11239e-06	down
SKI	hsa:6497	564.781	856.171	0.659659	-0.600208	5.89954e-09	1.41669e-06	down
HSPE1	hsa:3336	2111.32	1326.4	1.59177	0.670629	1.03478e-08	2.42501e-06	up
CALCOCO1	hsa:57658	180.512	313.761	0.575316	-0.797574	1.08015e-08	2.50119e-06	down
MVB12B	hsa:89853	165.574	291.056	0.568873	-0.813822	1.13471e-08	2.59661e-06	down
NR2F2	hsa:7026	499.483	756.896	0.65991	-0.599659	1.18947e-08	2.69028e-06	down
PRRC2B	hsa:84726	2833.91	4407.09	0.643034	-0.637034	1.25404e-08	2.80371e-06	down
RBPJ	hsa:3516	534.07	804.505	0.663849	-0.591072	1.36194e-08	3.01035e-06	down
LLGL1	hsa:3996	428.112	655.056	0.65355	-0.613631	1.3783e-08	3.01228e-06	down
FTH1P8		3502.11	2084.51	1.68006	0.748514	1.48105e-08	3.1657e-06	up
HBP1	hsa:26959	147.096	264.519	0.556089	-0.846612	1.53705e-08	3.24968e-06	down
ACTBP2		192.415	327.926	0.586763	-0.76915	1.60846e-08	3.36411e-06	down
SRGAP2	hsa:23380	263.137	434.643	0.605409	-0.724017	1.64782e-08	3.40976e-06	down
YPEL5	hsa:51646	205.069	343.913	0.59628	-0.745938	1.69977e-08	3.48023e-06	down
STBD1	hsa:8987	437.985	269.656	1.62424	0.699763	1.73056e-08	3.50637e-06	up
H1FX	hsa:8971	352.75	596.055	0.591808	-0.756798	2.04976e-08	4.02726e-06	down
SPP1	hsa:6696	765.32	316.891	2.41509	1.27208	2.35742e-08	4.54002e-06	up
INHBE	hsa:83729	182.672	61.5827	2.96629	1.56866	2.474e-08	4.68098e-06	up
PDK2	hsa:5164	30.9885	84.7903	0.365472	-1.45217	2.47875e-08	4.68098e-06	down
STC2	hsa:8614	934.429	579.641	1.61208	0.688925	2.9125e-08	5.39533e-06	up
HK2	hsa:3099	493.804	866.104	0.570144	-0.810601	3.33726e-08	6.12387e-06	down
MAP3K3	hsa:4215	139.9	280.15	0.499375	-1.00181	3.45168e-08	6.27464e-06	down
NDRG4	hsa:65009	221.906	394.015	0.563193	-0.8283	3.56621e-08	6.4228e-06	down
HK1	hsa:3098	10.4625	60.7124	0.17233	-2.53676	3.60437e-08	6.43198e-06	down
LOC100418910		117.938	246.645	0.478169	-1.06441	3.64138e-08	6.43896e-06	down
CPNE3	hsa:8895	365.7	563.91	0.648509	-0.624802	4.15254e-08	7.27666e-06	down
SULT2A1	hsa:6822	1153.59	459.954	2.50806	1.32657	4.93018e-08	8.33886e-06	up
HS6ST1	hsa:9394	213.411	349.848	0.61001	-0.713096	5.5282e-08	9.26755e-06	down
ZMAT3	hsa:64393	67.7997	141.873	0.477889	-1.06525	5.80403e-08	9.4869e-06	down
ZNF189	hsa:7743	343.187	207.842	1.65119	0.723506	6.2147e-08	1.00735e-05	up
DHRS2	hsa:10202	1.83407	24.7941	0.0739722	-3.75687	6.91e-08	1.08392e-05	down
PLA2G12B	hsa:84647	377.797	233.078	1.6209	0.696797	7.56675e-08	1.17745e-05	up
Top 100 differentially expressed genes based on their P-values.
